# Supplementary material
Source: PubMed Central journal article supplement (PMC6261663)

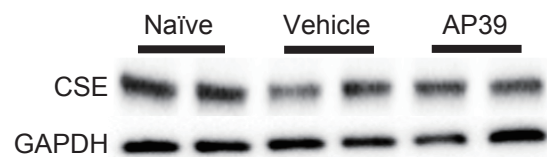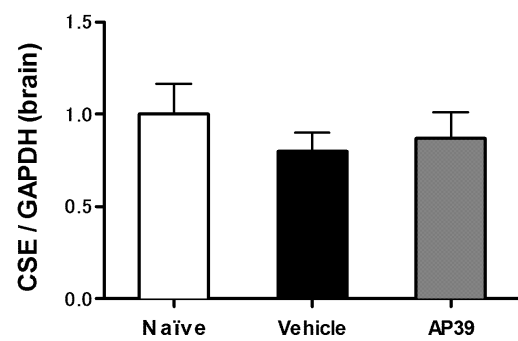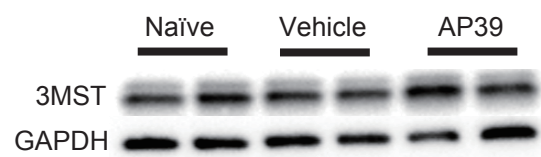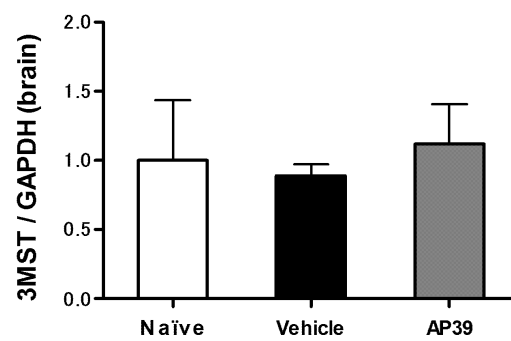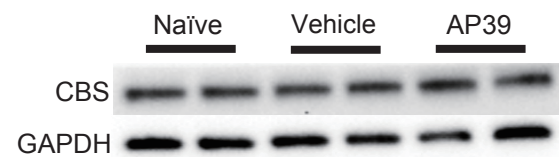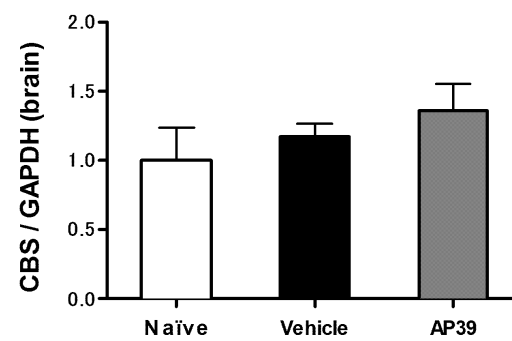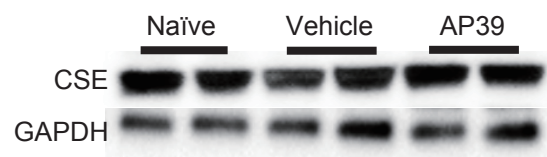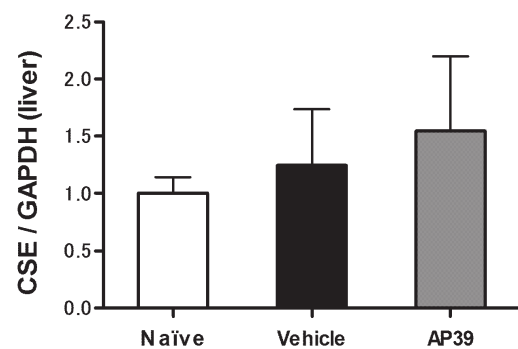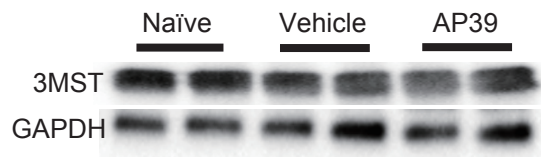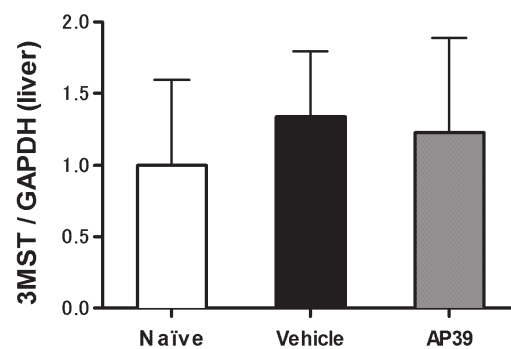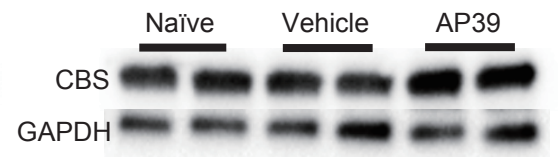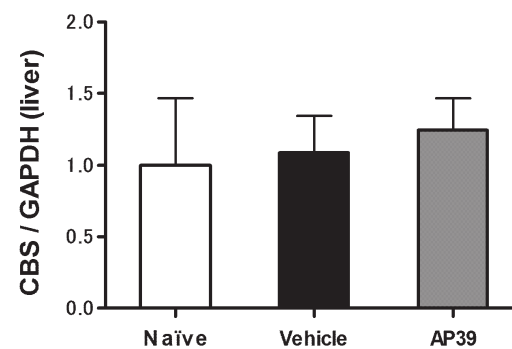

Supplement: NIHMS692666-supplement-2.pdf [file NIHMS692666-supplement-2.pdf]
